# Supplementary material for: mTAIL-seq reveals dynamic poly(A) tail regulation in oocyte-to-embryo development
Source: PubMed Central journal article supplement — Genes Dev. 2016 Jul 15;30(14):1671–82. doi: 10.1101/gad.284802.116 (PMC4973296; doi:10.1101/gad.284802.116), 2016-07-15

# Lim\_FigS1

## A Comparison of TAIL-seq protocols

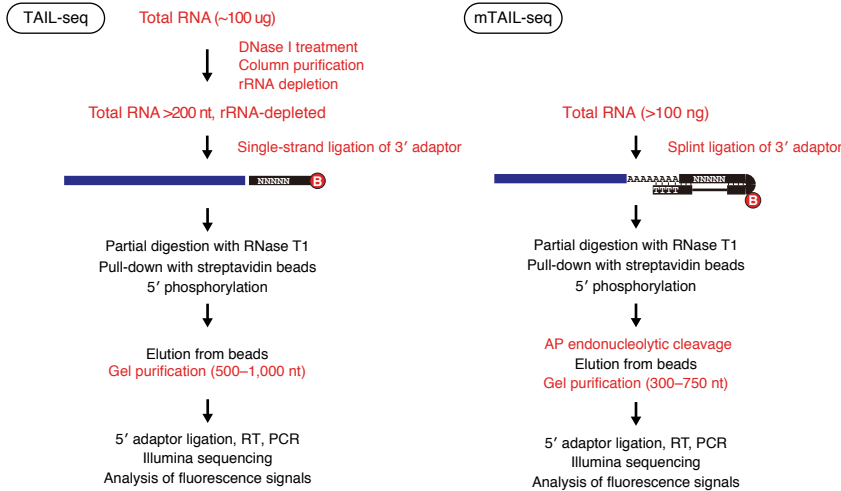

## B Ligation efficiency

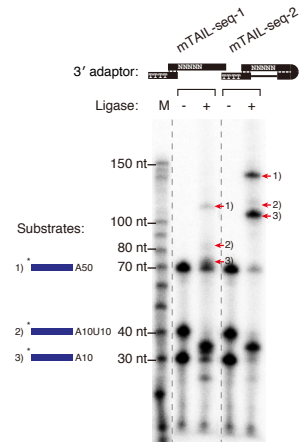

## C Position of the 5' end of read 1 relative to the annotated 3' end

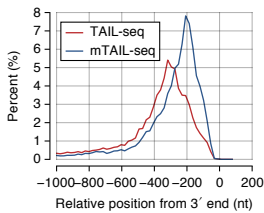

## D Reproducibility

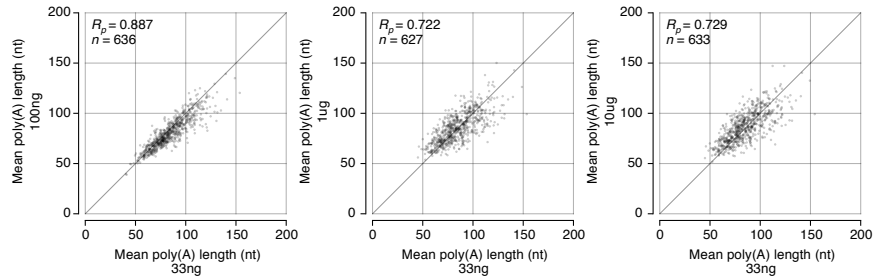

## E Poly(A) tail length comparison

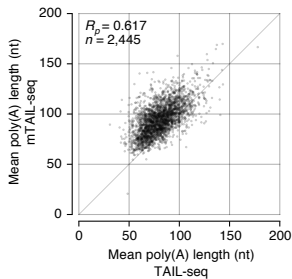

## F Capturing uridylated tails

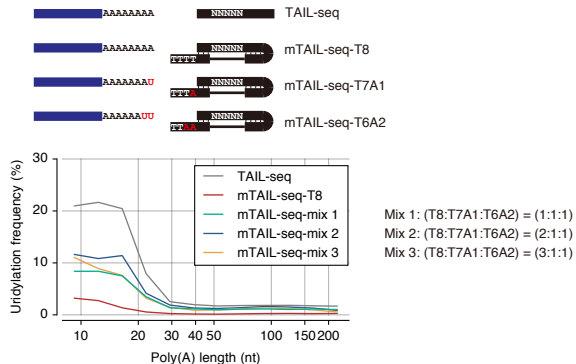

Supplement: supp_gad.284802.116_Supplemental_Fig_S1.pdf [file supp_gad.284802.116_Supplemental_Fig_S1.pdf]
