# Supplementary material for: mTAIL-seq reveals dynamic poly(A) tail regulation in oocyte-to-embryo development
Source: PubMed Central journal article supplement — Genes Dev. 2016 Jul 15;30(14):1671–82. doi: 10.1101/gad.284802.116 (PMC4973296; doi:10.1101/gad.284802.116), 2016-07-15

# Lim\_FigS2

## A 3' end uridylation frequency (by TAIL-seq)

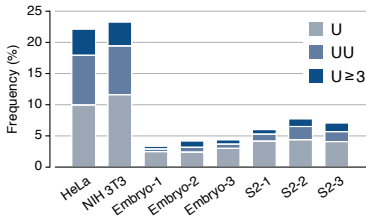

## B Virtual gel image of poly(A) tail length distribution

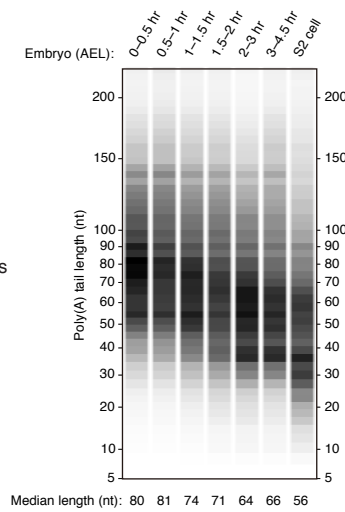

## C Reproducibility of mTAIL-seq libraries

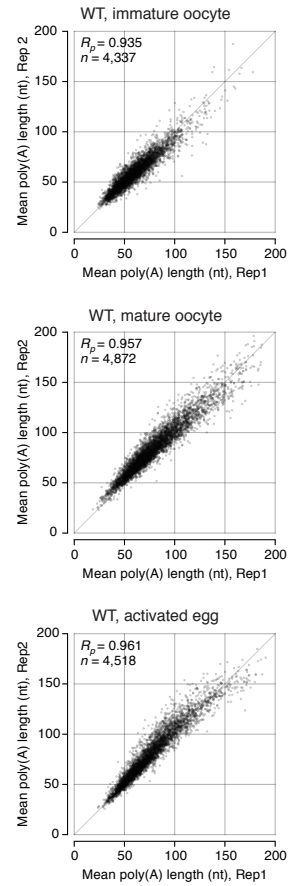

## D Global measurement of poly(A) tail length in replicates

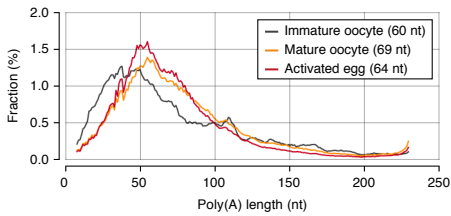

## E Comparison of poly(A) length changes to mRNA abundance changes

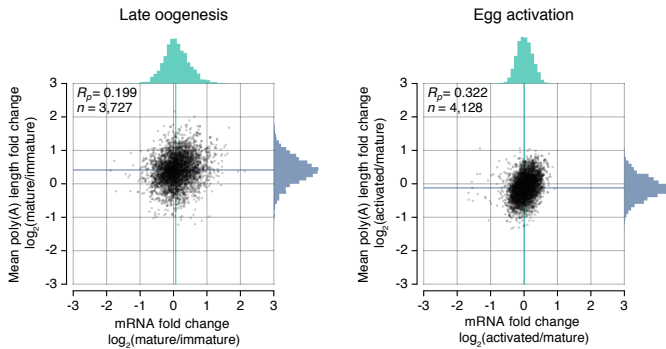

## F Hire-PAT assay

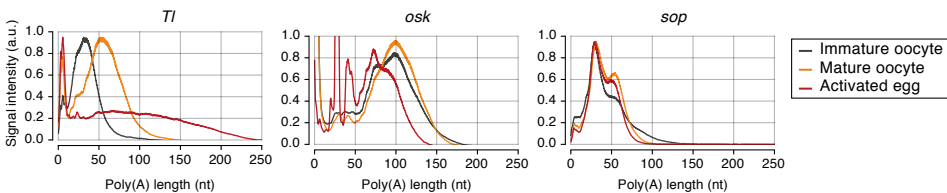

Supplement: supp_gad.284802.116_Supplemental_Fig_S2.pdf [file supp_gad.284802.116_Supplemental_Fig_S2.pdf]
