# Supplementary material for: mTAIL-seq reveals dynamic poly(A) tail regulation in oocyte-to-embryo development
Source: PubMed Central journal article supplement — Genes Dev. 2016 Jul 15;30(14):1671–82. doi: 10.1101/gad.284802.116 (PMC4973296; doi:10.1101/gad.284802.116), 2016-07-15

# Lim\_FigS4

## A Reproducibility of mTAIL-seq libraries

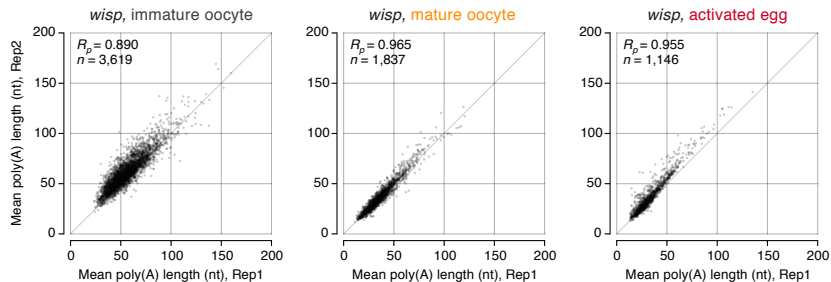

## B mRNA abundance change in *wisp* mutant

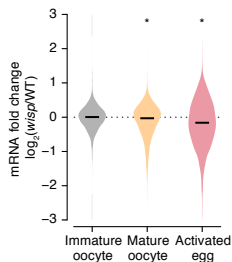

## C Cytoplasmic polyadenylation by Wispy

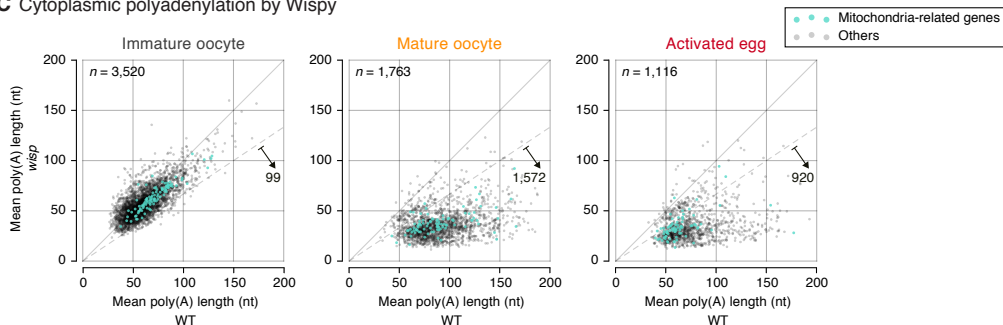

Supplement: supp_gad.284802.116_Supplemental_Fig_S4.pdf [file supp_gad.284802.116_Supplemental_Fig_S4.pdf]
